# Supplementary material
Source: PubMed Central journal article supplement (PMC5599745)
Supplement: JVI.00749-17_zjv999182941s1.pdf [file JVI.00749-17_zjv999182941s1.pdf]

## Supplemental Movie Legends

Supplemental Movie 1. 3D reconstruction of confocal images of US3 transfected cells. Confocal images of cell projections in US3-transfected ST cells showing US3 co-transfected with GFP (green), filamentous F-actin (red) and nuclei (cyan). 3D reconstruction shows that US3-induced actin-containing cell projections do not make contact with the underlying substrate. 3D reconstruction was made with the images of Figure 1.

Supplemental Movie 2. US3-induced TNTs allow transfer of GFP signal from US3/GFP-transfected cells to non-transfected cells. First arrow shows a TNT connecting a US3/GFP-co-transfected cell to a non-transfected cell. The non-transfected cell consequently becomes GFP positive, starts to display the US3-induced phenotype (rounded with cell projections) and makes contact with another non-transfected cell (second arrow). The second non-transfected cell also becomes GFP-positive. Movie was recorded by imaging cells every 15 minutes over a period of 24 hours.

Supplemental Movie 3. Dynamic mitochondria are present in US3-induced TNTs in US3-transfected cells. Mitochondrion moves through a US3-induced TNT in the direction of the transfected cell. Movie was recorded by imaging cells every 10 minutes over a period of 1 hour and 40 minutes.

Supplemental Movie 4. Dynamic mitochondria are present in US3-induced TNTs in PRV-infected cells. Mitochondrion moves through a US3-induced TNT connection in PRV-infected cells. Movie was recorded by imaging cells every 10 minutes over a period of 2 hours and 30 minutes.
